# Supplementary material
Source: HighWire-hosted journal article supplement (https://erj.ersjournals.com/content/58/6/2101907)
Supplement: inline-supplementary-material-1 [file inline-supplementary-material-1.pdf]

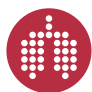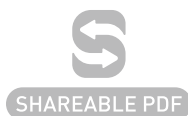

# Automated lung sound analysis using the LungPass platform: a sensitive and specific tool for identifying lower respiratory tract involvement in COVID-19

Elena A. Lapteva<sup>1</sup>, Olga N. Kharevich<sup>1</sup>, Victoria V. Khatsko<sup>2</sup>, Natalia A. Voronova<sup>3</sup>, Maksim V. Chamko<sup>2</sup>, Irina V. Bezruchko<sup>4</sup>, Elena I. Katibnikova<sup>1</sup>, Elena I. Loban<sup>5</sup>, Mostafa M. Mouawie<sup>6</sup>, Helena Binetskaya<sup>6</sup>, Sergey Aleshkevich<sup>6</sup>, Aleksey Karankevich<sup>6</sup>, Vitaly Dubinetski<sup>6</sup>, Jørgen Vestbo <sup>7,8</sup> and Alexander G. Mathioudakis <sup>7,8</sup>

<sup>1</sup>Belarusian State Medical Academy of Postgraduate Education, Minsk, Belarus. <sup>2</sup>5th City Clinical Hospital, Minsk, Belarus. <sup>3</sup>Minsk Regional Tuberculosis Dispensary, Minsk Region, Belarus. <sup>4</sup>Minsk Regional Pediatric Clinical Hospital, Minsk Region, Belarus. <sup>5</sup>Minsk Clinical Center of Phthisiopulmonology, Minsk, Belarus. <sup>6</sup>Healthy Networks OU, Tallinn, Estonia. <sup>7</sup>Division of Infection, Immunity and Respiratory Medicine, School of Biological Sciences, The University of Manchester, Manchester Academic Health Science Centre, Manchester, UK. <sup>8</sup>The North West Lung Centre, Wythenshawe Hospital, Manchester University NHS Foundation Trust, Manchester, UK.

Corresponding author: Alexander G. Mathioudakis ([a.mathioudakis@nhs.net](mailto:a.mathioudakis@nhs.net))

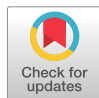

Shareable abstract (@ERSpublications)

**Automated lung sound analysis using the #LungPass platform is a sensitive and specific tool for identifying lower respiratory tract involvement in COVID-19** <https://bit.ly/3tyAgOD>

**Cite this article as:** Lapteva EA, Kharevich ON, Khatsko VV, *et al.* Automated lung sound analysis using the LungPass platform: a sensitive and specific tool for identifying lower respiratory tract involvement in COVID-19. *Eur Respir J* 2021; 58: 2101907 [DOI: 10.1183/13993003.01907-2021].

This single-page version can be shared freely online.

Copyright ©The authors 2021.

This version is distributed under the terms of the Creative Commons Attribution Non-Commercial Licence 4.0. For commercial reproduction rights and permissions contact [permissions@ersnet.org](mailto:permissions@ersnet.org)

Received: 7 July 2021  
Accepted: 5 Sept 2021

*To the Editor:*

Lower respiratory tract (LRT) involvement, observed in about 20% of patients suffering from coronavirus disease 2019 (COVID-19), is associated with a more severe clinical course, adverse outcomes and long-term sequelae [1, 2]. By pointing out people at risk of deterioration, early identification of LRT involvement could facilitate targeted and timely administration of treatments that could alter short- and long-term disease outcomes [3]. While imaging represents the gold standard diagnostic test for LRT involvement, it is associated with a potentially avoidable radiation burden and may not be easily accessible in some treatment settings, such as primary care [4]. Alternatively, oxygen desaturation appears to be a specific, but not sensitive marker, since ground glass changes or consolidation are often observed in the absence of hypoxia [5–7]. The sensitivity of chest auscultation in identifying LRT involvement has been evaluated in limited populations and varies [8, 9], possibly to some extent due to variable skill among the assessors.
